# Supplementary material
Source: MDPI journal article supplement (https://www.mdpi.com/2311-5629/8/3/35)
Supplement: s1 [file s1]

## **Supporting Information**

# **Spark desensitization of nanothermites by adding of highly electro-conductive carbon particles**

Pierre GIBOT

NS3E laboratory, UMR 3208 ISL/CNRS/UNISTRA, French-German Research Institute of Saint-Louis (ISL), 5 rue du Général Cassagnou, BP70034, 68301 Saint Louis, France

**Video SI: Combustion videos in unconfined configuration of the Al/WO<sub>3</sub>/Ketjenblack energetic nanocomposites with (a) 0, (b) 2.1, (c) 4.1, (d) 6, (e) 9.9, and (f) 18.8% vol. of highly conductive carbon additive, respectively. Equivalence ratio of 1.2.**
